# Supplementary material for: Including microbiome information in a multi-trait genomic evaluation: a case study on longitudinal growth performance in beef cattle
Source: Springer Nature journal article supplement (doi:10.1186/s12711-024-00887-6), 2024-03-15

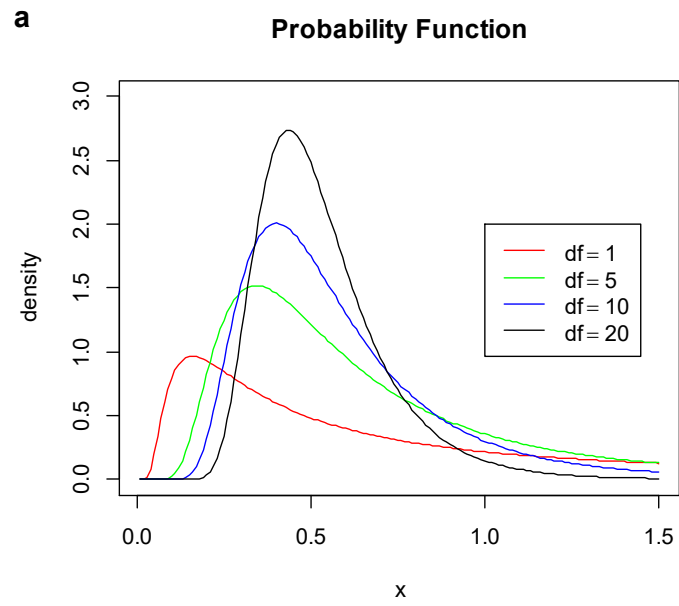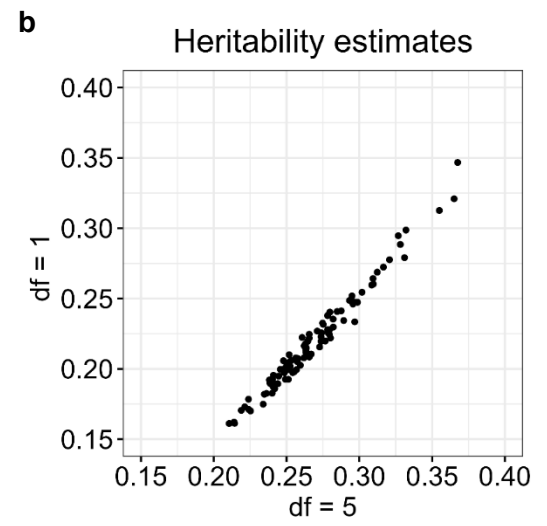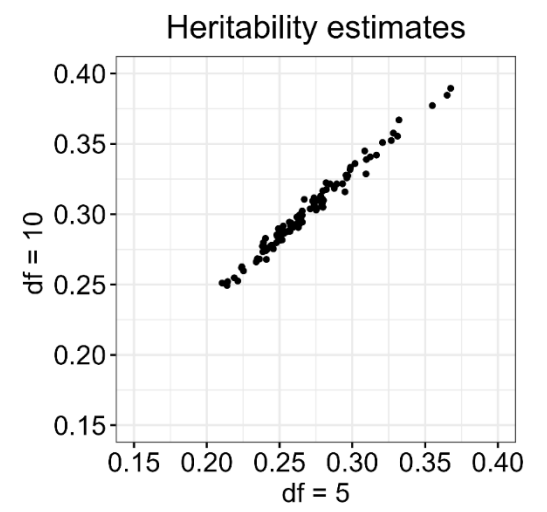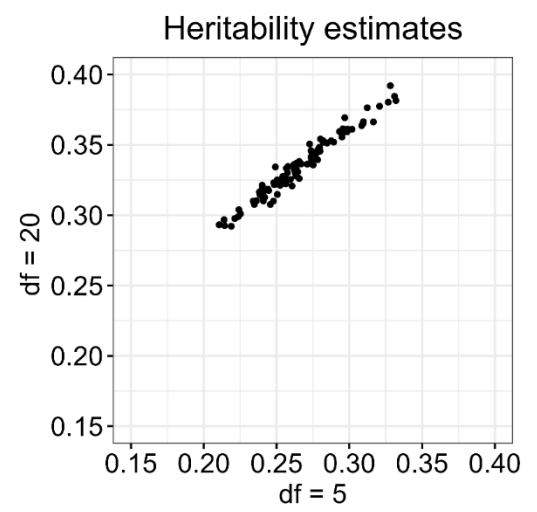

Supplement: MOESM3 [file 12711_2024_887_MOESM3_ESM.pdf]
